# Supplementary material for: Development of a tongue ultrasound-based predictive model for hypoxemia during painless gastroscopy in ASA I-II patients
Source: PeerJ. 2026 Jan 14;14:e20634. doi: 10.7717/peerj.20634 (PMC12811964; doi:10.7717/peerj.20634)
Supplement: Supplemental Information 1 [file peerj-14-20634-s001.xlsx]

## Sheet: Sheet1
order	gender	age	ASA	height	weight	BMI	obesity	MinSPO2	Hypoxemia	SevereHypoxemia	coughreflex	Hiccups	bodymove	propofol	M	HighM	TT	Hyomental
1	1	64	2	1.6	52	20.3125	0	98	0	0	0	0	0	130	2	0	62	42
2	2	71	2	1.6	50	19.5312	0	92	0	0	0	0	0	110	1	0	62	36
3	2	38	1	1.61	47	18.132	0	99	0	0	0	0	0	125	1	0	56	42
4	2	56	2	1.66	67	24.3141	0	97	0	0	0	0	0	120	2	0	65	44
5	2	63	2	1.58	44	17.6254	0	100	0	0	0	0	0	125	3	1	57	49
6	2	30	1	1.58	45	18.026	0	96	0	0	0	0	0	100	2	0	63	32
7	1	48	1	1.65	77	28.2828	0	98	0	0	1	0	0	120	3	1	60	50
8	2	41	1	1.57	56	22.719	0	98	0	0	1	0	0	110	2	0	62	32
9	1	29	1	1.7	81	28.0277	0	91	0	0	1	0	0	140	2	0	76	47
10	2	30	1	1.6	66	25.7812	0	97	0	0	1	0	1	180	2	0	67	40
11	2	39	1	1.57	53	21.5019	0	99	0	0	0	0	0	120	3	1	61	42
12	1	61	2	1.7	70	24.2215	0	96	0	0	0	0	0	140	2	0	72	42
13	2	52	2	1.6	45	17.5781	0	100	0	0	0	0	0	90	2	0	62	40
14	2	53	2	1.6	45	17.5781	0	100	0	0	0	0	0	100	2	0	54	48
15	2	62	2	1.56	60	24.6548	0	97	0	0	0	0	0	100	1	0	67	45
16	2	34	1	1.63	48	18.0662	0	100	0	0	0	0	0	100	1	0	54	42
17	1	57	2	1.7	80	27.6817	0	91	0	0	1	1	1	160	2	0	55	55
18	2	50	2	1.56	51	20.9566	0	98	0	0	1	0	1	175	2	0	65	52
19	1	42	1	1.66	65	23.5883	0	93	0	0	0	0	0	130	3	1	61	38
20	1	66	2	1.74	72	23.7812	0	87	1	0	0	0	0	120	2	0	68	43
21	2	43	2	1.72	50	16.901	0	100	0	0	0	0	0	150	1	0	61	49
22	2	37	2	1.55	56	23.3091	0	100	0	0	0	0	0	120	2	0	58	43
23	1	55	2	1.73	80	26.7299	0	95	0	0	0	0	1	160	3	1	65	51
24	2	62	1	1.6	56	21.875	0	100	0	0	0	0	0	110	2	0	66	38
25	2	65	1	1.6	45	17.5781	0	100	0	0	0	0	0	120	1	0	67	42
26	2	55	1	1.68	63	22.3214	0	79	1	1	1	0	1	150	3	1	72	41
27	2	30	1	1.6	46	17.9687	0	100	0	0	0	0	0	110	1	0	52	49
28	1	34	2	1.7	75	25.9516	0	85	1	0	0	0	0	160	2	0	73	53
29	2	38	1	1.55	56	23.3091	0	100	0	0	0	0	0	150	2	0	65	48
30	2	51	2	1.63	62	23.3355	0	88	1	0	0	0	0	160	3	1	71	42
31	1	18	1	1.78	65	20.5151	0	95	0	0	0	0	0	150	1	0	66	42
32	2	39	2	1.52	48	20.7756	0	93	0	0	0	0	0	120	2	0	54	44
33	2	39	2	1.65	52	19.1001	0	100	0	0	0	0	0	120	1	0	61	40
34	1	72	2	1.68	64	22.6757	0	92	0	0	0	0	0	130	3	1	68	38
35	2	54	2	1.51	55	24.1217	0	100	0	0	0	0	0	110	1	0	64	50
36	2	55	2	1.64	65	24.1672	0	100	0	0	0	0	0	130	2	0	63	51
37	2	49	1	1.6	64	25	0	100	0	0	0	1	0	120	2	0	62	56
38	2	32	1	1.55	48	19.9792	0	100	0	0	0	0	0	120	2	0	60	49
39	1	39	1	1.65	70	25.7117	0	92	0	0	0	0	0	130	3	1	68	42
40	2	57	2	1.56	60	24.6548	0	100	0	0	0	0	0	120	2	0	62	43
41	2	39	2	1.62	53	20.1951	0	100	0	0	0	0	0	120	2	0	58	39
42	1	35	1	1.6	54	21.0937	0	100	0	0	0	0	0	150	2	0	53	45
43	2	36	1	1.6	52	20.3125	0	99	0	0	0	0	0	130	2	0	67	47
44	1	39	2	1.76	65	20.984	0	95	0	0	0	0	0	120	2	0	69	47
45	1	57	2	1.7	65	22.4913	0	97	0	0	1	1	0	150	2	0	58	49
46	2	51	2	1.46	52	24.3948	0	100	0	0	0	0	0	115	2	0	57	41
47	2	60	2	1.55	54	22.4766	0	100	0	0	1	1	0	120	2	0	59	39
48	2	28	1	1.6	45	17.5781	0	93	0	0	0	0	0	90	1	0	66	32
49	1	33	1	1.66	65	23.5883	0	93	0	0	0	1	1	120	3	1	68	46
50	2	51	2	1.55	50	20.8117	0	100	0	0	1	0	0	100	2	0	55	39
51	2	63	2	1.56	40	16.4366	0	99	0	0	1	0	0	100	2	0	61	44
52	1	49	2	1.63	45	16.937	0	100	0	0	0	0	0	150	2	0	63	40
53	2	73	2	1.63	65	24.4646	0	93	0	0	1	0	0	110	2	0	68	54
54	2	37	1	1.5	54	24	0	100	0	0	1	0	0	125	2	0	51	61
55	1	58	2	1.72	91	30.7599	1	99	0	0	0	0	0	170	2	0	76	67
56	2	55	2	1.68	60	21.2585	0	100	0	0	0	0	0	140	2	0	54	46
57	1	38	1	1.68	60	21.2585	0	99	0	0	0	0	0	125	2	0	70	52
58	2	46	1	1.65	75	27.5482	0	90	0	0	0	0	0	105	3	1	71	49
59	2	35	2	1.6	60	23.4375	0	98	0	0	0	0	0	100	4	1	61	56
60	1	63	1	1.7	57	19.7232	0	100	0	0	0	0	0	125	2	0	56	39
61	2	56	1	1.55	59	24.5578	0	98	0	0	0	0	0	125	2	0	68	49
62	2	55	2	1.55	57	23.7253	0	100	0	0	0	0	0	125	2	0	63	44
63	1	56	2	1.69	67	23.4586	0	97	0	0	1	0	0	135	3	1	63	57
64	1	34	2	1.71	70	23.939	0	100	0	0	0	0	1	150	2	0	74	46
65	1	69	2	1.66	64	23.2254	0	100	0	0	0	0	0	110	2	0	63	42
66	1	68	2	1.64	67	24.9108	0	96	0	0	0	0	0	120	3	1	64	49
67	1	52	2	1.71	71	24.281	0	98	0	0	0	0	0	140	2	0	66	52
68	2	62	2	1.58	59	23.634	0	95	0	0	0	0	0	120	3	1	63	42
69	1	58	2	1.72	80	27.0416	0	96	0	0	0	1	0	125	3	1	68	48
70	1	58	2	1.7	70	24.2215	0	95	0	0	0	1	0	150	3	1	71	41
71	1	76	2	1.65	48	17.6309	0	97	0	0	0	0	0	125	2	0	54	40
72	1	67	2	1.65	60	22.0386	0	99	0	0	0	1	0	120	2	0	56	43
73	2	58	2	1.59	58	22.9421	0	100	0	0	0	0	0	125	2	0	60	40
74	2	29	1	1.53	46	19.6506	0	100	0	0	0	0	0	120	1	0	56	50
75	1	56	2	1.7	84	29.0657	0	93	0	0	0	0	0	180	3	1	63	56
76	2	52	2	1.64	52	19.3337	0	100	0	0	0	0	0	150	2	0	60	45
77	2	64	2	1.57	52	21.0962	0	92	0	0	1	1	0	180	2	0	60	60
78	1	54	2	1.77	76	24.2587	0	92	0	0	0	0	0	180	3	1	63	41
79	2	51	2	1.65	60	22.0386	0	98	0	0	0	0	0	160	2	0	63	50
80	2	45	2	1.72	72	24.3375	0	97	0	0	0	0	0	180	2	0	63	43
81	2	55	2	1.67	55	19.721	0	99	0	0	0	1	0	130	2	0	62	46
82	2	46	1	1.65	75	27.5482	0	100	0	0	0	0	0	120	2	0	63	37
83	1	52	2	1.69	78	27.31	0	93	0	0	0	0	0	170	3	1	67	51
84	2	58	2	1.64	58	21.5645	0	97	0	0	0	0	0	150	3	1	65	38
85	2	55	2	1.58	56	22.4323	0	99	0	0	0	0	0	120	3	1	62	52
86	1	71	2	1.67	56	20.0796	0	99	0	0	0	0	0	100	4	1	63	40
87	2	53	2	1.6	52	20.3125	0	93	0	0	0	0	0	100	2	0	63	41
88	1	59	2	1.58	53	21.2306	0	100	0	0	0	0	0	100	2	0	64	43
89	2	47	2	1.56	70	28.764	0	99	0	0	0	0	0	120	2	0	68	44
90	1	57	2	1.5	46	20.4444	0	90	0	0	0	0	1	130	2	0	62	49
91	1	80	2	1.62	65	24.7676	0	88	1	0	0	0	1	100	3	1	47	43
92	2	84	2	1.5	45	20	0	98	0	0	0	0	0	80	3	1	61	45
93	2	68	2	1.63	55	20.7008	0	99	0	0	0	0	1	120	3	1	59	39
94	2	66	2	1.6	70	27.3437	0	92	0	0	0	0	0	140	4	1	58	44
95	2	79	2	1.54	53	22.3478	0	99	0	0	0	0	0	90	2	0	65	42
96	2	28	1	1.68	60	21.2585	0	99	0	0	0	0	0	150	2	0	57	44
97	1	74	2	1.6	70	27.3437	0	97	0	0	0	0	0	110	3	1	76	43
98	2	67	2	1.65	55	20.202	0	99	0	0	0	0	0	110	2	0	61	40
99	2	50	2	1.65	57	20.9366	0	100	0	0	0	0	1	120	2	0	62	45
100	2	45	2	1.62	60	22.8624	0	100	0	0	0	0	0	120	2	0	69	48
101	2	26	1	1.61	51	19.6752	0	99	0	0	0	0	0	130	2	0	62	51
102	2	37	1	1.6	52	20.3125	0	100	0	0	0	0	0	140	2	0	61	45
103	2	31	1	1.66	54	19.5965	0	100	0	0	0	1	0	150	3	1	65	40
104	2	42	2	1.6	55	21.4844	0	100	0	0	0	0	0	110	3	1	57	50
105	1	46	2	1.65	52	19.1001	0	100	0	0	1	0	0	120	2	0	52	39
106	1	30	1	1.72	66	22.3094	0	98	0	0	0	0	0	140	2	0	59	52
107	2	58	2	1.61	60	23.1473	0	96	0	0	0	0	0	110	2	0	57	45
108	2	57	2	1.6	55	21.4844	0	98	0	0	0	0	0	120	2	0	61	45
109	1	17	1	1.8	63	19.4444	0	89	1	0	0	1	0	200	3	1	69	52
110	2	19	1	1.6	90	35.1562	1	90	0	0	1	0	0	220	2	0	75	52
111	1	52	2	1.78	85	26.8274	0	97	0	0	0	0	0	150	2	0	74	46
112	2	65	2	1.53	50	21.3593	0	99	0	0	1	0	0	200	2	0	63	48
113	2	55	2	1.59	61	24.1288	0	94	0	0	0	0	0	150	2	0	60	54
114	1	85	2	1.73	60	20.0474	0	99	0	0	0	0	0	100	1	0	65	45
115	1	46	2	1.7	57	19.7232	0	100	0	0	0	0	0	160	3	1	66	45
116	1	66	2	1.56	55	22.6003	0	100	0	0	0	0	0	120	2	0	62	45
117	1	48	2	1.7	70	24.2215	0	100	0	0	0	0	0	150	3	1	69	35
118	2	72	2	1.58	49	19.6283	0	100	0	0	0	0	0	130	2	0	61	42
119	2	37	1	1.55	55	22.8928	0	100	0	0	0	0	0	120	3	1	63	39
120	2	50	2	1.62	50	19.052	0	97	0	0	0	0	0	120	3	1	57	31
121	2	35	2	1.54	47	19.8178	0	100	0	0	0	0	0	120	2	0	61	37
122	1	51	2	1.7	62	21.4533	0	100	0	0	0	0	0	120	2	0	66	36
123	1	54	2	1.78	55	17.3589	0	100	0	0	0	0	0	130	2	0	59	40
124	1	56	2	1.6	57	22.2656	0	91	0	0	0	0	0	130	3	1	56	39
125	2	45	2	1.64	41	15.2439	0	100	0	0	0	0	0	100	1	0	54	48
126	1	50	2	1.66	65	23.5883	0	99	0	0	0	0	0	140	2	0	67	49
127	2	29	1	1.59	56	22.151	0	98	0	0	1	0	0	160	2	0	62	53
128	1	45	2	1.67	68	24.3824	0	91	0	0	1	0	1	200	3	1	62	56
129	2	71	2	1.5	35	15.5556	0	100	0	0	0	1	0	120	2	0	58	40
130	1	56	2	1.75	80	26.1224	0	91	0	0	0	1	0	220	4	1	70	58
131	1	49	2	1.65	56	20.5693	0	95	0	0	1	0	0	160	2	0	61	49
132	2	65	2	1.58	48	19.2277	0	99	0	0	1	0	0	200	2	0	61	37
133	1	56	2	1.7	61	21.1073	0	97	0	0	1	1	0	160	2	0	56	54
134	2	45	2	1.6	60	23.4375	0	100	0	0	0	0	0	240	3	1	66	42
135	1	56	2	1.58	70	28.0404	0	89	1	0	0	0	1	180	3	1	71	46
136	2	26	1	1.51	43	18.8588	0	100	0	0	0	0	0	110	2	0	58	45
137	1	31	1	1.67	55	19.721	0	98	0	0	0	0	0	160	2	0	69	50
138	2	52	2	1.7	60	20.7612	0	99	0	0	1	0	1	160	3	1	64	39
139	2	78	2	1.52	49	21.2084	0	100	0	0	0	1	0	180	3	1	56	55
140	2	55	2	1.58	55	22.0317	0	99	0	0	0	0	0	100	2	0	60	45
141	2	39	2	1.55	50	20.8117	0	96	0	0	0	0	0	130	2	0	59	45
142	2	37	2	1.65	64	23.5078	0	100	0	0	0	0	0	180	2	0	61	48
143	2	44	2	1.6	54	21.0937	0	85	1	0	1	1	0	350	3	1	57	41
144	2	52	2	1.63	64	24.0882	0	85	1	0	0	0	0	150	2	0	68	50
145	2	60	2	1.5	50	22.2222	0	100	0	0	1	0	0	140	2	0	64	52
146	2	60	2	1.6	54	21.0937	0	100	0	0	1	0	0	180	2	0	58	46
147	2	71	2	1.59	59	23.3377	0	85	1	0	0	0	0	150	2	0	65	43
148	2	34	2	1.59	54	21.3599	0	99	0	0	0	0	0	150	2	0	55	54
149	1	60	2	1.7	60	20.7612	0	98	0	0	1	0	0	150	2	0	60	49
150	2	45	2	1.59	52	20.5688	0	100	0	0	0	0	0	170	2	0	58	44
151	1	42	2	1.67	67	24.0238	0	100	0	0	0	0	0	175	2	0	68	50
152	1	44	2	1.62	65	24.7676	0	99	0	0	0	0	1	220	2	0	57	42
153	1	37	2	1.66	64	23.2254	0	80	1	1	0	0	0	160	4	1	67	46
154	1	71	2	1.64	57	21.1927	0	93	0	0	0	0	0	135	2	0	57	49
155	2	86	2	1.6	42	16.4062	0	99	0	0	0	0	0	75	2	0	58	48
156	2	57	2	1.55	62	25.8065	0	100	0	0	0	0	0	80	2	0	68	42
157	1	49	2	1.65	55	20.202	0	99	0	0	0	1	0	150	1	0	53	52
158	2	55	2	1.61	55	21.2183	0	99	0	0	0	0	0	120	2	0	62	46
159	1	38	1	1.67	57	20.4382	0	99	0	0	0	0	0	130	2	0	68	38
160	2	67	2	1.6	55	21.4844	0	99	0	0	0	0	0	150	3	1	56	45
161	2	58	2	1.58	45	18.026	0	98	0	0	0	0	0	120	3	1	55	44
162	1	68	2	1.7	62	21.4533	0	98	0	0	0	0	0	120	3	1	52	61
163	1	50	2	1.6	60	23.4375	0	99	0	0	0	0	0	130	3	1	59	55
164	1	39	1	1.62	60	22.8624	0	97	0	0	0	0	0	180	2	0	67	40
165	1	37	1	1.77	75	23.9395	0	97	0	0	0	0	0	200	3	1	71	45
166	1	54	2	1.69	72	25.2092	0	100	0	0	0	0	0	120	2	0	62	46
167	2	61	2	1.56	52	21.3675	0	100	0	0	0	0	1	100	2	0	63	47
168	2	53	2	1.59	51	20.1733	0	100	0	0	0	0	0	120	1	0	61	44
169	1	50	2	1.65	69	25.3444	0	100	0	0	1	1	0	170	2	0	63	53
170	2	54	2	1.6	60	23.4375	0	100	0	0	1	1	0	120	2	0	67	49
171	2	48	2	1.6	60	23.4375	0	95	0	0	0	0	0	130	2	0	66	49
172	2	37	1	1.6	49	19.1406	0	88	1	0	1	1	0	160	3	1	68	47
173	1	45	2	1.68	75	26.5731	0	100	0	0	0	0	0	150	2	0	63	55
174	2	37	2	1.55	49	20.3954	0	100	0	0	0	0	0	110	3	1	58	37
175	1	44	2	1.7	75	25.9516	0	100	0	0	0	0	0	120	3	1	61	47
176	1	58	2	1.71	72	24.623	0	100	0	0	0	0	0	150	2	0	69	47
177	2	49	2	1.62	58	22.1003	0	100	0	0	0	0	0	130	2	0	66	47
178	2	56	2	1.55	48	19.9792	0	99	0	0	0	0	0	120	2	0	61	40
179	1	50	2	1.7	71	24.5675	0	95	0	0	0	0	0	160	1	0	60	54
180	2	35	2	1.52	44	19.0443	0	100	0	0	0	0	0	150	2	0	58	43
181	2	48	2	1.62	62	23.6244	0	98	0	0	0	0	0	120	2	0	66	41
182	2	34	1	1.64	65	24.1672	0	100	0	0	0	0	0	120	3	1	63	53
183	1	73	2	1.64	60	22.3081	0	85	1	0	1	1	0	150	4	1	70	48
184	1	39	1	1.65	60	22.0386	0	100	0	0	0	0	0	120	2	0	59	45
185	2	60	2	1.67	57	20.4382	0	100	0	0	0	0	0	130	2	0	58	49
186	2	45	2	1.6	57	22.2656	0	98	0	0	0	0	0	130	2	0	68	39
187	1	57	2	1.73	60	20.0474	0	95	0	0	0	0	0	150	2	0	64	60
188	2	38	1	1.6	61	23.8281	0	100	0	0	0	0	0	140	2	0	59	42
189	2	51	2	1.52	42	18.1787	0	100	0	0	0	0	0	125	2	0	53	48
190	2	40	1	1.53	44	18.7962	0	98	0	0	0	0	1	130	3	1	54	45
191	2	57	2	1.6	53	20.7031	0	100	0	0	0	0	1	120	2	0	46	56
192	2	36	1	1.65	55	20.202	0	100	0	0	0	0	1	100	1	0	48	46
193	2	49	2	1.6	72	28.125	0	100	0	0	0	0	1	150	2	0	64	58
194	1	20	1	1.82	72	21.7365	0	98	0	0	0	0	1	170	2	0	53	56
195	2	29	1	1.63	60	22.5827	0	100	0	0	0	0	0	100	1	0	62	43
196	2	44	2	1.61	61	23.533	0	97	0	0	1	0	1	120	3	1	55	52
197	1	34	1	1.75	69	22.5306	0	88	1	0	0	0	1	160	3	1	53	52
198	1	31	1	1.75	55	17.9592	0	100	0	0	0	0	0	130	2	0	62	48
199	2	54	2	1.6	80	31.25	1	93	0	0	0	0	1	200	1	0	69	49
200	2	64	2	1.57	53	21.5019	0	93	0	0	1	0	1	130	2	0	65	43
201	1	47	2	1.72	65	21.9713	0	95	0	0	0	0	1	200	3	1	66	39
202	2	57	2	1.64	77	28.6288	0	94	0	0	0	0	0	150	3	1	69	49
203	2	55	2	1.62	73	27.8159	0	89	1	0	1	0	1	175	3	1	71	43
204	2	58	2	1.65	60	22.0386	0	92	0	0	1	0	1	130	2	0	62	45
205	1	37	1	1.75	80	26.1224	0	91	0	0	0	0	0	150	2	0	73	48
206	2	53	2	1.62	53	20.1951	0	88	1	0	0	0	0	120	3	1	65	46
207	2	57	2	1.7	84	29.0657	0	98	0	0	0	0	0	200	2	0	57	44
208	1	59	2	1.6	85	33.2031	1	80	1	1	1	0	0	160	2	0	74	62
209	2	57	2	1.5	56	24.8889	0	90	0	0	1	0	0	130	2	0	59	49
210	2	55	2	1.55	50	20.8117	0	95	0	0	0	0	0	150	2	0	53	42
211	2	54	2	1.58	65	26.0375	0	88	1	0	1	0	0	175	2	0	69	59
212	1	53	2	1.68	70	24.8016	0	99	0	0	0	0	0	160	2	0	59	45
213	1	51	2	1.65	77	28.2828	0	90	0	0	0	0	0	175	2	0	64	55
214	2	48	2	1.56	48	19.7239	0	99	0	0	0	0	0	130	2	0	63	42
215	2	50	2	1.58	67	26.8386	0	91	0	0	0	0	0	180	3	1	61	52
216	1	59	2	1.69	77	26.9598	0	100	0	0	0	0	0	150	2	0	67	51
217	1	42	2	1.66	60	21.7738	0	100	0	0	0	0	0	160	2	0	62	49
218	1	65	2	1.7	65	22.4913	0	100	0	0	0	0	0	160	3	1	62	45
219	2	37	2	1.76	70	22.5981	0	92	0	0	1	0	1	150	3	1	62	52
220	2	46	2	1.54	48	20.2395	0	100	0	0	0	0	0	160	2	0	69	48
221	2	56	2	1.56	52	21.3675	0	100	0	0	0	0	0	150	2	0	58	52
222	2	33	1	1.62	54	20.5761	0	100	0	0	0	0	0	160	3	1	58	44
223	1	42	2	1.69	85	29.7609	0	94	0	0	1	0	0	200	4	1	72	51
224	2	65	2	1.61	49	18.9036	0	100	0	0	0	0	0	130	2	0	65	41
225	2	63	2	1.56	50	20.5457	0	50	1	1	1	0	0	180	3	1	59	43
226	1	49	2	1.68	64	22.6757	0	100	0	0	0	0	0	160	2	0	62	55
227	1	42	2	1.62	70	26.6728	0	91	0	0	0	0	0	170	2	0	61	53
228	1	79	2	1.65	55	20.202	0	100	0	0	0	0	0	150	2	0	66	51
229	2	70	2	1.58	53	21.2306	0	100	0	0	0	0	0	100	2	0	53	52
230	1	33	2	1.74	78	25.763	0	100	0	0	0	0	0	160	1	0	65	52
231	2	63	2	1.53	53	22.6409	0	100	0	0	0	0	0	10	2	0	59	49
232	1	60	2	1.68	64	22.6757	0	98	0	0	0	0	0	120	3	1	57	46
233	1	35	2	1.74	76	25.1024	0	99	0	0	0	0	0	150	3	1	58	47
234	1	47	2	1.72	60	20.2812	0	100	0	0	0	0	0	125	2	0	64	52
235	1	54	2	1.74	72	23.7812	0	79	1	1	0	0	1	160	3	1	72	52
236	2	49	2	1.62	53	20.1951	0	100	0	0	0	0	0	110	2	0	47	54
237	1	72	2	1.63	62	23.3355	0	90	0	0	0	0	0	100	2	0	56	53
238	2	46	2	1.66	53	19.2336	0	100	0	0	0	0	0	150	2	0	57	62
239	1	33	1	1.81	95	28.9979	0	88	1	0	0	0	0	190	2	0	72	60
240	1	36	2	1.73	80	26.7299	0	97	0	0	0	0	1	160	2	0	62	54
241	1	59	2	1.78	83	26.1962	0	100	0	0	0	0	0	150	2	0	65	46
242	2	51	2	1.63	53	19.9481	0	100	0	0	0	0	0	170	3	1	58	49
243	1	41	1	1.69	72	25.2092	0	98	0	0	0	0	0	150	2	0	62	52
244	2	74	2	1.62	49	18.6709	0	98	0	0	0	0	0	120	3	1	57	44
245	2	38	1	1.56	51	20.9566	0	100	0	0	0	0	0	160	2	0	56	52
246	2	37	1	1.55	50	20.8117	0	91	0	0	0	0	0	150	2	0	56	53
247	1	81	2	1.7	60	20.7612	0	96	0	0	0	0	0	150	2	0	65	51
248	1	54	2	1.6	60	23.4375	0	99	0	0	0	0	0	150	3	1	60	56
249	2	72	2	1.58	62	24.8358	0	100	0	0	0	0	0	130	2	0	61	54
250	1	60	2	1.69	63	22.0581	0	93	0	0	0	0	0	120	2	0	66	47
251	2	47	2	1.7	70	24.2215	0	100	0	0	0	0	0	130	3	1	58	41
252	1	39	1	1.8	80	24.6914	0	98	0	0	0	0	0	160	3	1	69	51
253	2	64	2	1.6	60	23.4375	0	83	1	1	0	0	0	100	3	1	63	52
254	2	59	2	1.59	69	27.2932	0	96	0	0	0	0	0	175	2	0	62	53
255	2	42	1	1.56	52	21.3675	0	99	0	0	0	0	0	110	2	0	56	56
256	1	57	2	1.7	75	25.9516	0	92	0	0	0	0	0	150	2	0	60	44
257	2	42	1	1.5	40	17.7778	0	99	0	0	0	0	0	170	1	0	50	48
258	1	57	2	1.6	73	28.5156	0	82	1	1	0	0	0	175	2	0	70	48
259	2	33	1	1.52	55	23.8054	0	94	0	0	0	0	0	160	3	1	63	52
260	1	58	2	1.75	72	23.5102	0	100	0	0	0	0	0	160	3	1	67	53
261	2	52	2	1.6	51	19.9219	0	100	0	0	0	0	0	100	2	0	59	45
262	1	45	2	1.58	65	26.0375	0	100	0	0	0	0	0	130	3	1	60	56
263	2	56	2	1.67	46	16.494	0	100	0	0	0	0	0	100	2	0	53	53
264	2	42	2	1.65	51	18.7328	0	95	0	0	0	0	0	120	2	0	56	55
265	1	33	1	1.79	75	23.4075	0	98	0	0	0	0	0	150	3	1	65	51
266	1	52	2	1.68	70	24.8016	0	100	0	0	0	0	0	150	3	1	70	56
267	2	50	2	1.52	46	19.91	0	98	0	0	0	0	0	100	2	0	53	54
268	1	41	2	1.81	102	31.1346	1	88	1	0	0	0	0	200	3	1	67	62
269	1	48	2	1.8	87	26.8519	0	94	0	0	0	0	0	180	2	0	68	61
270	1	54	2	1.7	65	22.4913	0	73	1	1	1	0	0	160	2	0	62	54
271	1	63	2	1.75	70	22.8571	0	96	0	0	0	0	1	175	2	0	56	43
272	1	73	2	1.58	61	24.4352	0	95	0	0	0	0	0	125	3	1	63	48
273	1	34	2	1.76	90	29.0548	0	94	0	0	0	0	0	130	2	0	70	51
274	1	53	2	1.78	91	28.7211	0	83	1	1	0	0	0	220	2	0	62	56
275	1	56	2	1.8	60	18.5185	0	100	0	0	0	0	0	130	4	1	61	50
276	2	44	2	1.65	55	20.202	0	97	0	0	0	0	0	120	2	0	64	52
277	2	27	1	1.63	63	23.7118	0	100	0	0	0	0	0	130	2	0	61	53
278	2	29	1	1.69	54	18.9069	0	100	0	0	0	0	0	100	1	0	55	50
279	1	36	1	1.8	77	23.7654	0	99	0	0	0	0	0	150	3	1	64	55
280	2	53	2	1.62	68	25.9107	0	83	1	1	0	0	0	150	4	1	64	51
281	2	55	2	1.58	46	18.4265	0	100	0	0	0	0	0	150	2	0	51	56
282	1	74	2	1.75	60	19.5918	0	95	0	0	0	0	0	125	2	0	55	52
283	2	54	2	1.69	56	19.6072	0	89	1	0	1	0	0	125	3	1	63	53
284	2	48	2	1.54	54	22.7694	0	100	0	0	0	0	0	130	2	0	53	48
285	1	50	2	1.7	75	25.9516	0	83	1	1	0	0	0	180	3	1	72	50
286	2	54	2	1.62	60	22.8624	0	100	0	0	0	0	0	125	3	1	67	44
287	2	48	2	1.6	60	23.4375	0	100	0	0	0	0	0	110	2	0	54	59
288	2	57	2	1.75	64	20.898	0	100	0	0	0	0	0	140	2	0	62	58
289	1	35	1	1.61	55	21.2183	0	100	0	0	0	0	0	150	2	0	58	46
290	1	58	2	1.63	57	21.4536	0	93	0	0	0	0	0	120	3	1	58	44
291	1	70	2	1.6	58	22.6562	0	100	0	0	0	0	0	200	2	0	61	53
292	1	42	2	1.58	40	16.0231	0	96	0	0	0	0	0	175	2	0	58	38
293	1	50	2	1.6	51	19.9219	0	100	0	0	0	1	0	150	2	0	57	3
294	2	42	2	1.6	67	26.1719	0	92	0	0	0	0	0	130	2	0	62	54
295	2	48	2	1.8	90	27.7778	0	94	0	0	0	0	0	200	1	0	70	55
296	2	52	2	1.7	72	24.9135	0	99	0	0	0	0	0	175	3	1	68	63
297	1	68	2	1.62	55	20.9572	0	86	1	0	0	0	1	125	2	0	66	44
298	2	37	1	1.68	55	19.487	0	100	0	0	0	0	0	150	3	1	63	53
299	2	35	1	1.7	80	27.6817	0	89	1	0	0	0	0	180	3	1	69	53
300	2	38	1	1.8	87	26.8519	0	97	0	0	0	0	0	150	2	0	67	61
301	1	28	1	1.63	52	19.5717	0	100	0	0	0	0	0	120	2	0	59	47
302	1	67	2	1.53	56	23.9224	0	99	0	0	0	0	0	110	1	0	59	48
303	2	46	2	1.62	76	28.959	0	100	0	0	0	0	0	120	3	1	57	50
304	2	31	1	1.6	90	35.1562	1	86	1	0	0	0	0	160	2	0	67	61
